# Supplementary material
Source: Elsevier journal article supplement (https://www.sciencedirect.com/science/article/pii/S1698031X18300645)
Supplement: mmc1 [file S1698031X18300645:mmc1.docx]

**Anexo**

**Escala de Mitos sobre la Sexualidad (EMS)**

Para cada una de las siguientes afirmaciones, indica hasta qué punto estás de acuerdo o en desacuerdo. Por favor, marca con un X el número que más se corresponda con tu opinión general.

Escala de respuesta:

**1 2 3 4 5**

**Completamente En Neutral (ni De acuerdo Completamente**

**en desacuerdo desacuerdo de acuerdo ni de acuerdo**

**en desacuerdo)**

|  |  | 1 | 2 | 3 | 4 | 5 |
| --- | --- | --- | --- | --- | --- | --- |
| 1 | El "flechazo" es una atracción física muy fuerte, es signo de amor romántico y verdadero |  |  |  |  |  |
| 2 | La "marcha atrás" es un método anticonceptivo seguro |  |  |  |  |  |
| 3 | Los remedios caseros abortivos (perejil, hinojo, Vit. C...) son muy efectivos |  |  |  |  |  |
| 4 | Si tu mejor amigo/a fuese homosexual te sentirías incómodo/a, porque podría intentar ligar contigo |  |  |  |  |  |
| 5 | Tener muchos celos es una prueba de amor por parte de tu pareja |  |  |  |  |  |
| 6 | Cuando una chica tiene la regla, aunque tenga relaciones no se puede quedar embarazada |  |  |  |  |  |
| 7 | El alcohol aumenta el rendimiento sexual |  |  |  |  |  |
| 8 | Una persona con SIDA debe ser excluida de la sociedad |  |  |  |  |  |
| 9 | Si se tienen relaciones sexuales en la bañera, la piscina o el mar no se puede quedar embarazada una chica |  |  |  |  |  |
| 10 | Una "buena" mujer no tendría una aventura de una noche, pero sería normal que la tuviese un hombre |  |  |  |  |  |
| 11 | Entre una pareja no es necesaria la privacidad de tu mundo (libre acceso a las redes sociales, correos electrónicos, perfiles... de la pareja) |  |  |  |  |  |
| 12 | Si una adolescente se queda embarazada sin quererlo es por fallo de los métodos anticonceptivos, no por usarlos mal |  |  |  |  |  |
| 13 | Un chico con muchas relaciones es más deseado porque puede enseñar a la chica |  |  |  |  |  |
| 14 | Todo el mundo nace heterosexual y sólo cambian algunas personas cuando son mayores |  |  |  |  |  |
| 15 | Hasta que no se tenga una pareja no se puede sentir una persona realizada totalmente |  |  |  |  |  |
| 16 | En algunas ocasiones una chica es violada porque lo ha estado buscando |  |  |  |  |  |
| 17 | Si tu pareja rompe la relación es un fracaso tuyo |  |  |  |  |  |
| 18 | Si una chica se queda embarazada, es que quiere "pillar" al chico |  |  |  |  |  |
| 19 | Los/as chicos/as que dicen ser bisexuales son personas "viciosas" |  |  |  |  |  |
| 20 | El SIDA es una enfermedad que sólo lo tienen las personas drogadictas, las personas homosexuales y las prostitutas |  |  |  |  |  |
| 21 | Si una chica dice que no quiere tener sexo, está haciéndose la dura, pero en realidad sí quiere |  |  |  |  |  |
| 22 | El hombre debe tener el rol dominante y la mujer el pasivo, al menos en el sexo |  |  |  |  |  |
| 23 | La homosexualidad y transexualidad no es algo natural |  |  |  |  |  |
| 24 | Un chico que demuestre cariño, sensibilidad y delicadeza es homosexual |  |  |  |  |  |
| 25 | Es amor que tu chico/a vigile todo lo que haces (redes sociales, teléfono,…) o controle con quién hablas o dónde vas |  |  |  |  |  |
| 26 | Si una chica invita a un chico a ver una película en su casa significa que quiere sexo |  |  |  |  |  |
| 27 | Una chica que nunca se arregle ni se pinte es lesbiana |  |  |  |  |  |
